# Supplementary material for: Evaluation of the corticosteroid dose at Pneumocystis pneumonia onset in non-HIV patients receiving steroids and the period from the discontinuation of trimethoprim-sulfamethoxazole prophylaxis to the onset of Pneumocystis pneumonia
Source: Research Square preprint supplement (doi:10.21203/rs.3.rs-243505/v1), 2021-02-26
Supplement: Supplementary file 2 [file 762b01ac51b7236ad5409fde.xlsx]

## Sheet: Sheet1
Table 3 The detailed characteristics of the 11 patients who discontinued prophylactic TMP-SMX before PCP development.
Patient no.	Age	Sex	Daily dose of corticosteroids when PCP developed (PSL equivalent dose), mg	Duration of corticosteroids use, days	Period from discontinuation of TMP-SMX to the onset of PCP, days	Immuno-suppressants use	Other prophylaxis for PCP	Underlying diseases	In-hospital motality
1	61	M	0	0	106	-	-	FL, CBT	Alive
2	39	F	2	748	80	-	-	ALL, PBSCT	Alive
3	65	M	2.5	433	105	-	-	ATL, BMT	Alive
4	57	M	5	1716	94	-	-	IP, DM	Alive
5	74	F	5	2084	175	Methotrexate	-	RA	Alive
6	90	M	10	142	96	-	-	DM, CES	Alive
7	89	M	10	566	90	-	-	RA, DM, CKD Pemphigus	Dead
8	74	M	12	925	98	Tacrolimus	-	RA, IP, DM	Dead
9	80	M	15	116	95	Ciclosporin	Pentamidine	IP, DM, CKD	Dead
10	69	M	16	542	79	Methotrexate	-	MPA, Pneumoconiosis	Alive
11	73	F	30	126	44	-	-	IP, DM, CKD	Dead
TMP-SMX, trimethoprim-sulfamethoxazole; PCP, pneumocystis pneumonia.; FL, follicular lymphoma; CBT, cord blood transplantation; ALL, acute lymphoblastic leukemia; PBSCT, peripheral blood stemcell transplantation; ATL, adult T-cell leukemia; BMT, bone marrow transplantation; IP, interstitial pneumonia; DM, diabetes melitus; RA, rheumatoid arthritis; CES, cholesterol embolism syndrome; CKD, chronic…
