# Supplementary material for: Evaluation of the corticosteroid dose at Pneumocystis pneumonia onset in non-HIV patients receiving steroids and the period from the discontinuation of trimethoprim-sulfamethoxazole prophylaxis to the onset of Pneumocystis pneumonia
Source: Research Square preprint supplement (doi:10.21203/rs.3.rs-243505/v1), 2021-02-26
Supplement: Supplementary file 3 [file a83208232fad91f70b3a8ac3.xlsx]

## Sheet: Sheet1
Table 1
Characteristics of all patients.
Total - no.	39
Age, years - median. (range)	70 (27-92)
Gender, female - no. (%)	18 (46.2)
Ever-smokers - no. (%)	21 (53.8)
Underlying diseases
Autoimmune diseases - no. (%)	21 (53.8)
Rheumatoid arthritis - no. (%)	9 (23.1)
Vasculitis - no. (%)	7 (17.9)
Malignancies - no. (%)	13 (33.3)
Hematological malignancies - no. (%)	7 (17.9)
Solid cancers - no. (%)	6 (15.4)
Interstitial pneumonia - no. (%)	15 (38.5)
Diabetes mellitus - no. (%)	14 (35.9)
Renal disease - no. (%)	15 (38.5)
Hemodialysis - no. (%)	4 (10.3)
Renal transplantation - no. (%)	1 (2.6)
Corticosteroids use - no. (%)	32 (82.1)
Corticosteroids dose, mg/day - median. (range)	12 (0-60)
Corticosteroids duration, day - median. (range)	104 (0-2084)
Immunosuppressants use - no. (%)	14 (35.9)
TMP-SMX use - no. (%)	0 (0)
Aerosolized pentamidine use - no. (%)	4 (10.3)
Atovaquone use - no. (%)	0 (0)
Initial laboratory findings
Alb, g/dL - median. (range)	3.3 (2.1-6.1)
WBC, cell/μg - median. (range)	7800 (100-19900)
LDH, IU/L, mg/L - median. (range)	454 (200-826)
CRP, mg/L - median. (range)	8.83 (0.17-26.3)
KL-6, IU/μL - median. (range)	813.3 (187-4910)
β-D-glucan, pg/ml - median. (range)	30.2 (3.8-337.3)
Diagnostic methods
BALF PCR - no. (%)	15 (38.5)
Sputum PCR - no. (%)	23 (59.0)
BALF cytology - no. (%)	4 (10.3)
In-hospital mortality - no. (%)	17 (43.6)
TMP-SMX, trimethoprim-sulfamethoxazole; Alb, albumin; WBC, white blood cell; LDH, lactate dehydrogenase; CRP, C-reactive protein; KL-6, Krebs von den Lungen-6; BALF, bronchoalveolar lavage fluid; PCR, polymerase chain reaction.
