# Supplementary material for: Evaluation of the corticosteroid dose at Pneumocystis pneumonia onset in non-HIV patients receiving steroids and the period from the discontinuation of trimethoprim-sulfamethoxazole prophylaxis to the onset of Pneumocystis pneumonia
Source: Research Square preprint supplement (doi:10.21203/rs.3.rs-243505/v1), 2021-02-26
Supplement: Supplementary file 4 [file 75e072f25901cec45518a83c.xlsx]

## Sheet: Sheet1
Table 2
Characteristics of patients who were never administered prophylactic TMP-SMX treatment and those who discontinued it.
	Patients who were never adiministerd TMP-SMX	Patients who were discontinued TMP-SMX
Total - no. (%)	28 (71.8)	11 (28.2)	p
Age, years - median. (range)	70 (27-92)	73 (39-90)	0.77
Gender, female - no. (%)	15 (53.6)	3 (27.3)	0.171
Ever-smokers - no. (%)	17 (60.7)	5 (45.5)	0.471
Underlying diseases
Autoimmune diseases - no. (%)	17 (60.7)	4 (36.4)	0.285
Rheumatoid arthritis - no. (%)	6 (21.4)	3 (27.3)	0.693
Vasculitis - no. (%)	6 (21.4)	1 (9.1)	0.649
Malignancies - no. (%)	10 (35.7)	3 (27.3)	0.719
Hematological malignancies - no. (%)	4 (14.3)	3 (27.3)	0.379
Solid cancers - no. (%)	6 (21.4)	0 (0)	0.158
Interstitial pneumonia - no. (%)	11 (39.3)	4 (36.4)	1
Diabetes mellitus - no. (%)	8 (28.6)	6 (54.5)	0.156
Renal disease - no. (%)	11 (39.3)	4 (36.4)	1
Hemodialysis - no. (%)	4 (14.3)	0 (0)	0.309
Renal transplantation - no. (%)	1 (3.6)	0 (0)	1
Corticosteroids use - no. (%)	22 (78.6)	10 (90.9)	0.649
Corticosteroids dose, mg/day - median. (range)	12.8 (0-60)	10 (0-30)	0.163
Corticosteroids duration, day - median. (range)	64.5 (0-728)	542 (0-2084)	<0.01
Immunosuppressants use - no. (%)	10 (35.7)	4 (36.4)	1
Aerosolized pentamidine use - no. (%)	3 (10.7)	1 (9.1)	1
Initial laboratory findings
Alb, g/dL - median. (range)	3.3 (2.5-6.1)	3.6 (2.4-4.1)	0.878
WBC, cell/μg - median. (range)	7700 (100-19900)	7900 (6100-16700)	0.683
LDH, IU/L, mg/L - median. (range)	459.5 (200-763)	431 (331-826)	0.924
CRP, mg/L - median. (range)	6.33 (0.17-26.3)	9.92 (1.93-24.37)	0.387
KL-6, IU/μL - median. (range)	860.4 (216-4910)	801.9 (187-2170)	0.636
β-D-glucan, pg/ml - median. (range)	49.6 (3.8-337.3)	20.5 (4.5-184.1)	0.23
Diagnostic methods
BALF PCR - no. (%)	12 (42.9)	3 (27.3)	0.477
Sputum PCR - no. (%)	15 (53.6)	8 (72.7)	0.471
BALF cytology - no. (%)	2 (7.1)	2 (18.2)	0.562
In-hospital mortality - no. (%)	13 (46.4)	4 (36.4)	0.725
TMP-SMX, trimethoprim-sulfamethoxazole; Alb, albumin; WBC, white blood cell; LDH, lactate dehydrogenase; CRP, C-reactive protein; KL-6, Krebs von den Lungen-6; BALF, bronchoalveolar lavage fluid; PCR, polymerase chain reaction.
